# Supplementary material for: Controlled synthesis of open-mouthed epitope-imprinted polymer nanocapsules with a PEGylated nanocore and their application for fluorescence detection of target protein
Source: Royal Society of Chemistry journal article supplement (doi:10.1039/d2ra02298b), 2022-01-01
Supplement: d2ra02298b1.pdf [file d2ra02298b1.pdf]

## Electronic Supplementary Information (ESI)

Controlled synthesis of open-mouthed epitope-imprinted polymer  
nanocapsules containing a PEGylated nanocore for fluorescence detection  
of the target protein

Xingjia Feng, Siyu Jin, Dongru Li, Guoqi Fu\*

Key Laboratory of Functional Polymer Materials of Ministry of Education, Institute of  
Polymer Chemistry, College of Chemistry, Nankai University, Tianjin 300071, China

\* Corresponding author.

E-mail address: gqfu@nankai.edu.cn (G. Fu)

Tel: 86 22 23501443

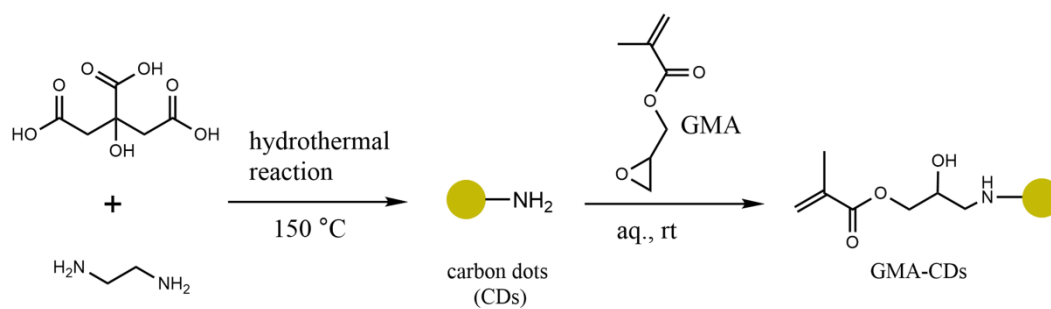

**Scheme S1.** Schematic illustration of the procedure for the synthesis and subsequent surface functionalization of carbon dots.

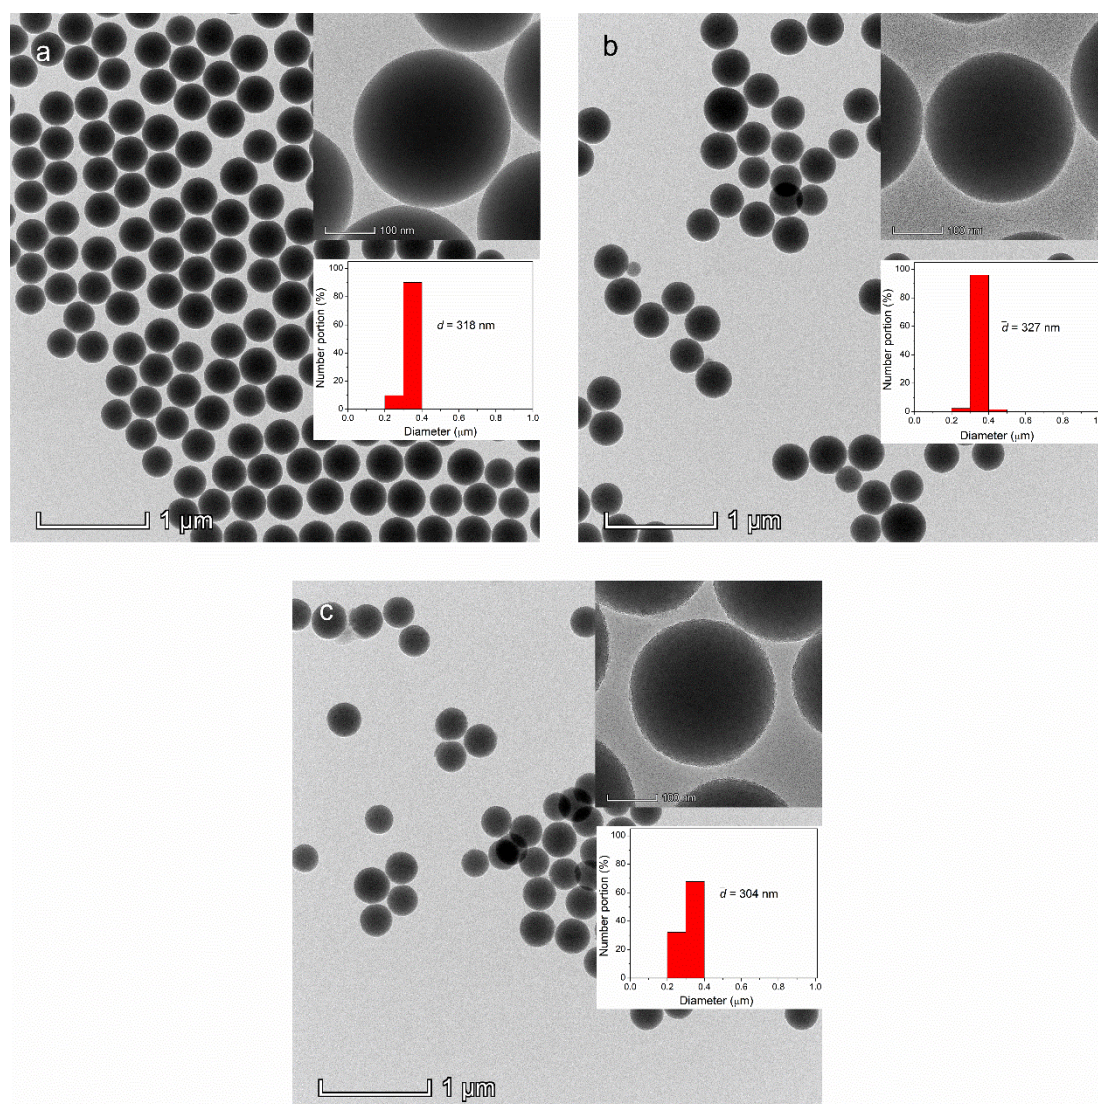

**Fig. S1.** TEM images of (a) the original SiO<sub>2</sub> NPs, (b) MIP JNPs obtained by surface-initiated ATRP over the SiO<sub>2</sub>-NH<sub>2</sub>// epitope/iB-Br JNPs, and (c) OM-MIP NCs obtained after partial

etching the SiO<sub>2</sub> nanocore inside the MIP JNPs. The insets (top) show the high-resolution images with a bar of 100 nm. The insets (bottom) indicate the counted size distribution.

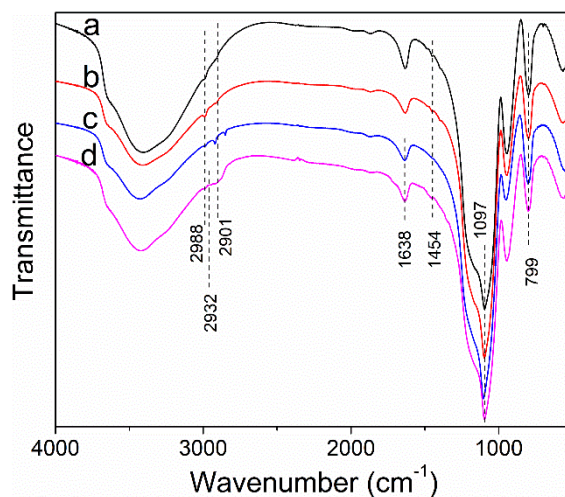

**Fig. S2.** FT-IR spectra of (a) SiO<sub>2</sub> NPs, (b) SiO<sub>2</sub>-NH<sub>2</sub> NPs, (c) SiO<sub>2</sub>-NH<sub>2</sub>//iB-Br/Ac-Br JNPs and (d) SiO<sub>2</sub>-PEG NPs. For all the particles, the strong and broad peak around 1097 cm<sup>-1</sup> indicates the Si-O-Si asymmetric stretching, and the bands observed at around 799 cm<sup>-1</sup> shows the Si-O vibration. For the SiO<sub>2</sub>-NH<sub>2</sub> NPs, the peak at 1454 cm<sup>-1</sup> corresponds to the N-H bending vibration, and the peaks at 2988 cm<sup>-1</sup> and 2901 cm<sup>-1</sup> correspond to the stretching vibration of C-H bonds of the methyl or methylene groups of APTES, confirming the surface modification of SiO<sub>2</sub> NPs by APTES. For the SiO<sub>2</sub>-NH<sub>2</sub>//iB-Br/Ac-Br JNPs, the appearance of characteristic bands at 1638 cm<sup>-1</sup> represents the bromoisobutyrate residue. With respect to SiO<sub>2</sub>-PEG NPs, the two peaks at 2932 cm<sup>-1</sup> and 1638 cm<sup>-1</sup> corresponding to the vibration of -CH<sub>2</sub>- and C=O bonds suggest the successful modification with silanized m-PEG.

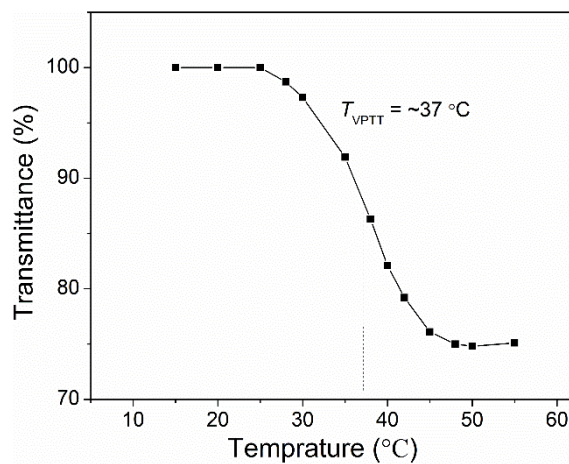

**Fig. S3.** Transmittance of OM-MIP NCs in the PB buffer with increasing temperatures. The volume phase transition temperature (VPTT) was determined to be about 37 °C.

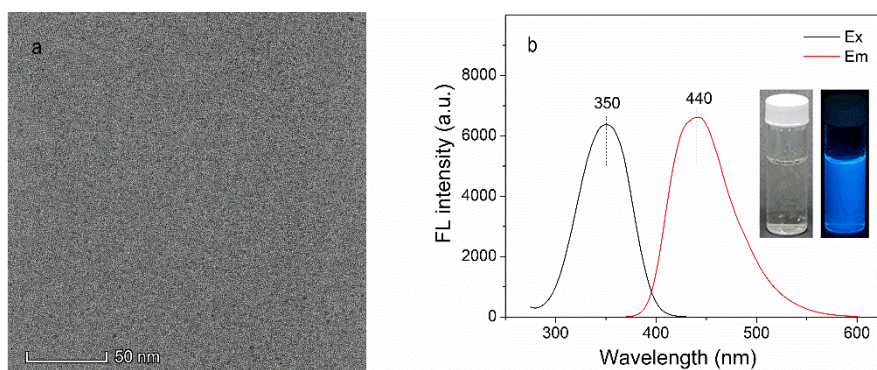

**Fig. S4.** (a) TEM image of the GMA-CDs. (b) FL excitation and emission spectra of the GMA-CDs dispersed in the PB buffer. The insets show the photographs of the GMA-CDs solution under sunlight (left) and a 365 nm UV lamp (right), respectively.

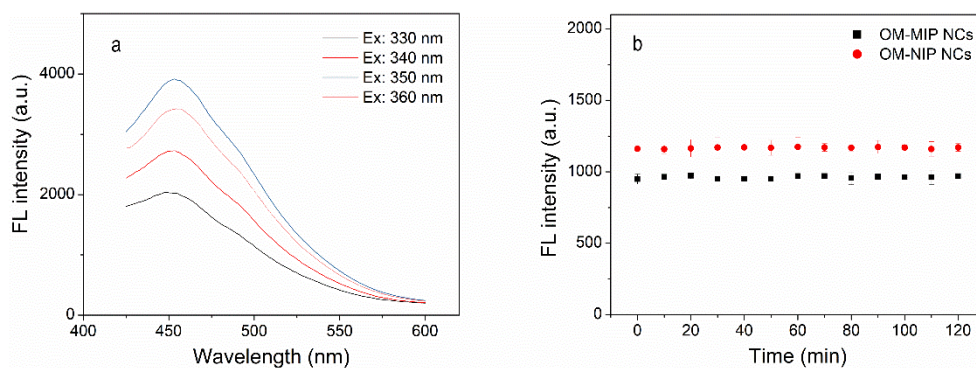

**Fig. S5.** (a) The FL emission spectra of the OM-MIP NCs dispersed in PB buffer under varied  $\lambda_{ex}$ . (b) The FL emission intensity change of the OM-MIP and OM-NIP NCs in PB buffer during continuous FL measurements.

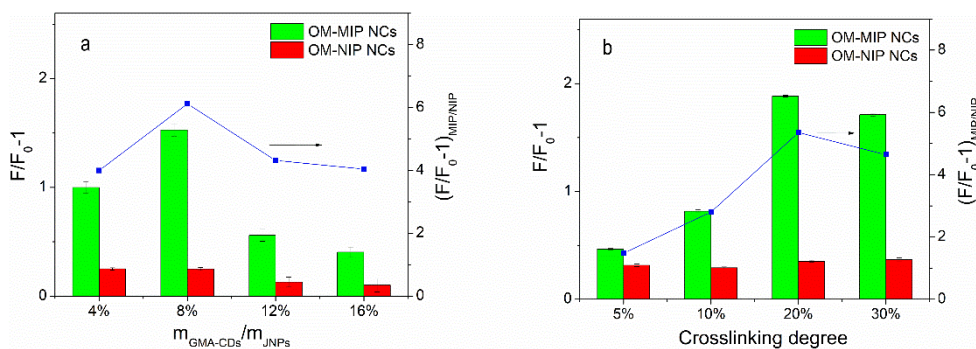

**Fig. S6.** The effect of (a) mass ratio of GMA-CDs relative to support JNPs and (b) molar crosslinking in the polymerization recipe on the FL response of the resultant OM-MIP and OM-NIP NCs.

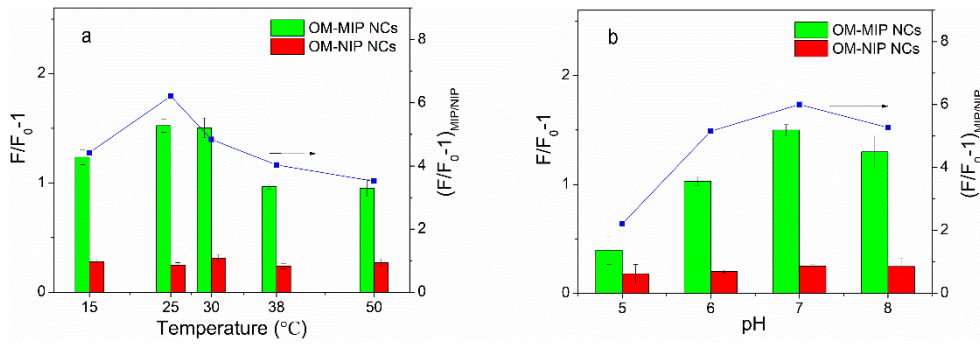

**Fig. S7.** The effect of (a) temperature and (b) pH on the FL response of the OM-MIP and OM-NIP NCs.

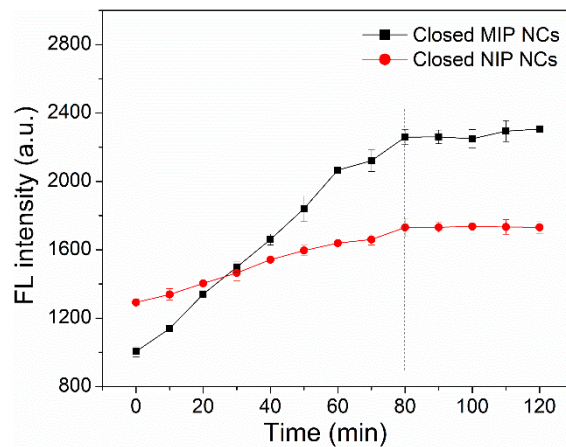

**Fig. S8.** FL response kinetics of the closed MIP and NIP NCs.

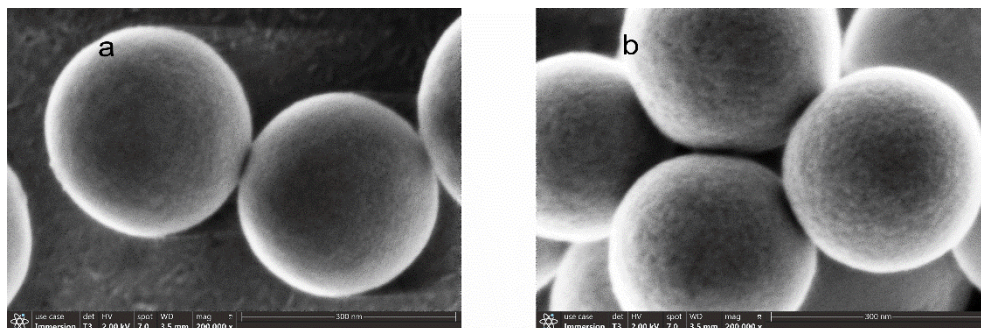

**Fig. S9.** SEM images of (a) the original  $\text{SiO}_2$  NPs and (b) the  $\text{SiO}_2$  NPs after partially etched with 80 mM of  $\text{NH}_4\text{HF}_2$ .

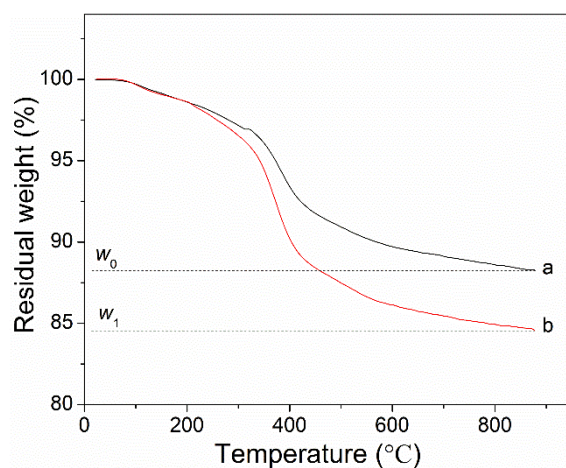

**Fig. S10.** TGA curves of (a) the original SiO<sub>2</sub> NPs and (b) PEGylated SiO<sub>2</sub> NPs. The amount of PEG chains grafted to the PEGylated SiO<sub>2</sub> was estimated to be ~42 mg/g.

**Table S1.** Comparison of the FL detection performance of the reported molecular imprinting based FL sensors for BSA or HSA detection.

| FL substance | Template                       | Linear range (μM) | LOD (nM) | IF <sub>SV</sub> | Ref.      |
|--------------|--------------------------------|-------------------|----------|------------------|-----------|
| ZnO QDs      | BSA                            | 3.0-30            | -        | 2.4              | [1]       |
| MWCNT QDs    | BSA                            | 0.5-3.5           | 80.0     | 4.2              | [2]       |
| CdTe/CdS QDs | BSA                            | 2-64              | 500      | 1.9              | [3]       |
| Dansyl       | BSA                            | 0.2-2.65          | 560      | 21               | [4]       |
| CdTe QDs     | C-terminus nonapeptides of HSA | 0.25-5            | 44.3     | 2.6              | [5]       |
| CdTe QDs     | C-terminus nonapeptides of BSA | 0.5-10            | 110      | 4.8              | [6]       |
| CDs          | C-terminus nonapeptides of BSA | 0.2-6             | 43.8     | 7.8              | [7]       |
| CDs          | C-terminus nonapeptides of BSA | 0.25-6            | 38.1     | 6.1              | This work |

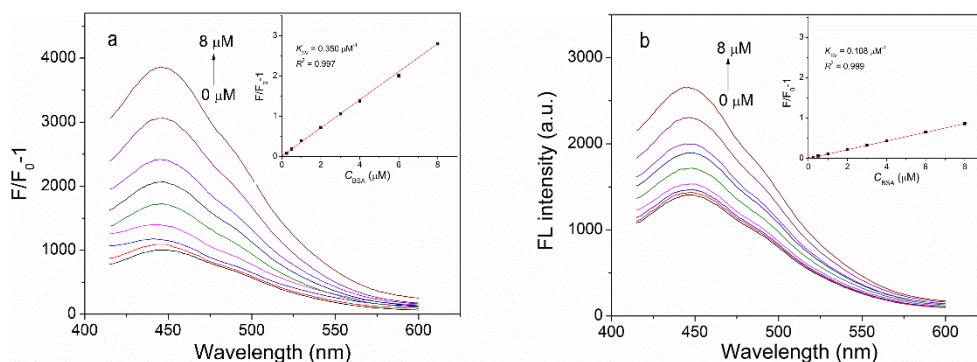

**Fig. S11.** FL emission spectra of (a) non-PEGylated OM-MIP and (b) non-PEGylated OM-NIP NCs in the presence of BSA (0–8  $\mu\text{M}$ ), respectively. The insets show the corresponding Stern–Volmer plots.

**Table S2.** The spiked recoveries and relative standard deviations (RSDs, %;  $n=3$ ) for the detection of BSA in the 1000-fold diluted bovine serum using the OM-MIP NCs.

| spiked ( $\mu\text{M}$ ) | found ( $\mu\text{M}$ ) | recovery $\pm$ RSDs (%) <sup>a</sup> |
|--------------------------|-------------------------|--------------------------------------|
| 0                        | $0.45 \pm 0.02$         | -                                    |
| 0.5                      | $0.97 \pm 0.02$         | $104.0 \pm 4.6$                      |
| 1.0                      | $1.43 \pm 0.03$         | $98.0 \pm 2.6$                       |
| 2.0                      | $2.47 \pm 0.03$         | $101.0 \pm 1.7$                      |
| 4.0                      | $4.44 \pm 0.05$         | $99.8 \pm 1.2$                       |

<sup>a</sup> The recoveries were calculated based on the BSA concentration found in the spiked samples after subtraction of that found in the non-spiked sample.



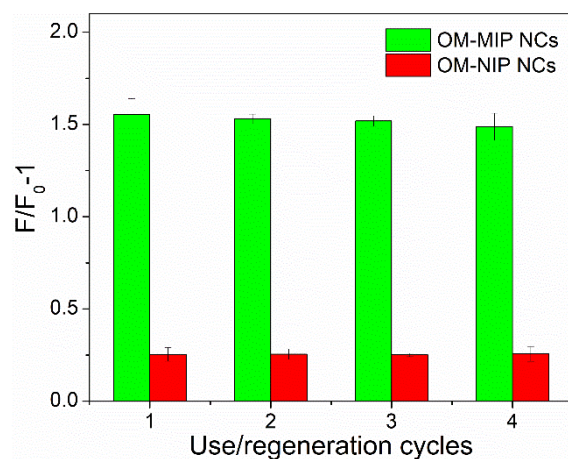

**Fig. S12.** The reusability of the OM-MIP NCs and OM-NIP NCs with 4 use/regeneration cycles. The used NCs were regenerated by washing with 1% SDS/1% acetic acid solution for removal of the BSA bound, followed by washing with NaCl solution (1 M) and water.

## References

- [1] X.J. Li, J.J. Zhou, L. Tian, W. Li, B.L. Zhang, H.P. Zhang, Q.Y. Zhang, Bovine serum albumin surface imprinted polymer fabricated by surface grafting copolymerization on zinc oxide rods and its application for protein recognition, *J. Sep. Sci.* 38 (2015) 3477–3486.
- [2] Z.Q. Ding, S.A. Bligh, L. Tao, J. Quan, H.L. Nie, L.M. Zhu, X. Gong, Molecularly imprinted polymer based on MWCNT-QDs as fluorescent biomimetic sensor for specific recognition of target protein, *Mater. Sci. Eng., C* 48 (2015) 469–479.
- [3] L.S. Wang, L.S. Zhao, A novel nanocomposite optosensing sensor based on porous molecularly imprinted polymer and dual emission quantum dots for visual and high selective detection of bovine serum albumin, *Colloids Surf., A* 632 (2022) 127843.
- [4] E. Battista, P.L. Scognamiglio, N. Di Luise, U. Raucci, G. Donati, N. Rega, P.A. Netti, F. Causa, Turn-on fluorescence detection of protein by molecularly imprinted hydrogels based on supramolecular assembly of peptide multi-functional blocks, *J. Mater. Chem. B* 6 (2018)

1207–1215.

[5] Y.Z. Wang, D.Y. Li, X.W. He, W.Y. Li, Y.K. Zhang, Epitope imprinted polymer nanoparticles containing fluorescent quantum dots for specific recognition of human serum albumin, *Microchim. Acta* 182 (2015) 1465–1472.

[6] Y.Q. Yang, X.W. He, Y.Z. Wang, W.Y. Li, Y.K. Zhang, Epitope imprinted polymer coating CdTe quantum dots for specific recognition and direct fluorescent quantification of the target protein bovine serum albumin, *Biosens. Bioelectron* 54 (2014) 266–272.

[7] S.T. Zhang, Z.Q. Liu, S.Y. Jin, Y.F. Bai, X.J. Feng, G.Q. Fu, A method for synthesis of oriented epitope-imprinted open-mouthed polymer nanocapsules and their use for fluorescent sensing of target protein, *Talanta* 234 (2021) 122690.
